# Supplementary material for: Solvent-Free Fabrication of Thick Electrodes in Thermoplastic Binders for High Energy Density Lithium-Ion Batteries
Source: MDPI journal article supplement (doi:10.3390/nano12193320), 2022-09-23
Supplement: s1 [file s1]

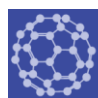

## Supplementary Materials

# Solvent-Free Fabrication of Thick Electrodes in Thermoplastic Binders for High Energy Density Lithium-Ion Batteries

Han-Min Kim <sup>1,2</sup>, Byeong-Il Yoo <sup>1,2</sup>, Jin-Woo Yi <sup>1</sup>, Min-Jae Choi <sup>2,\*</sup> and Jung-Keun Yoo <sup>1,3,\*</sup><sup>1</sup> Composites Research Division, Carbon Composites Department, Korea Institute of Materials Science (KIMS), Changwon 51508, Korea<sup>2</sup> Department of Chemical and Biochemical Engineering, Dongguk University, Seoul 04620, Korea<sup>3</sup> Advanced Materials Engineering Division, University of Science and Technology (UST), Daejeon 34113, Korea

\* Correspondence: minjae.choi@dgu.ac.kr (M.-J.C.); yoojk@kims.re.kr (J.-K.Y.)

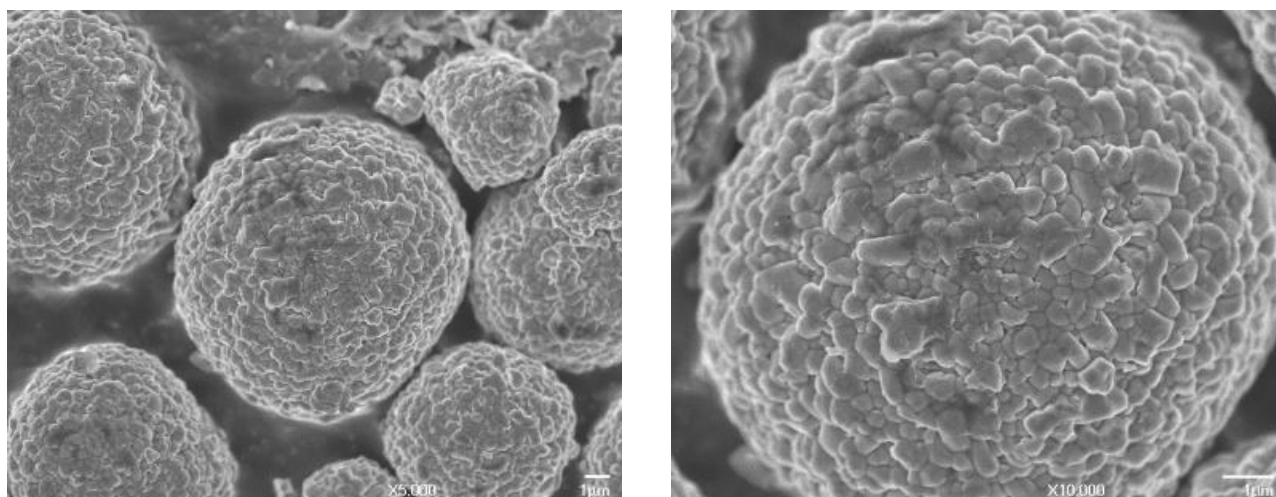**Figure S1.** SEM image of NCM811 surface. Scale bar: 1  $\mu\text{m}$ .**Table S1.** NCM811 particle analysis information.

| NCM 811 | Particle-size Distribution ( $\mu\text{m}$ ) |      |      | Specific Surface Area ( $\text{m}^2/\text{g}$ ) | Excess Lithium (%) |                                 |       |
|---------|----------------------------------------------|------|------|-------------------------------------------------|--------------------|---------------------------------|-------|
|         | Dmin                                         | D50  | Dmax |                                                 | LiOH               | Li <sub>2</sub> CO <sub>3</sub> | Total |
|         | 0.7                                          | 11.3 | 28.9 | 0.46                                            | 0.269              | 0.140                           | 0.555 |

**Table S2.** Electrode thickness change before/after wetting the electrolyte.

|                             |                | Wet PVDF | Dry PVDF | Wet Phenoxy Resin | Dry Phenoxy Resin |
|-----------------------------|----------------|----------|----------|-------------------|-------------------|
| Thickness ( $\mu\text{m}$ ) | Before wetting | 150.48   | 152.47   | 149.75            | 150.63            |
|                             | After wetting  | 164.02   | 167.72   | 155.74            | 155.15            |
| Thickness Change (%)        |                | 108      | 110      | 104               | 103               |

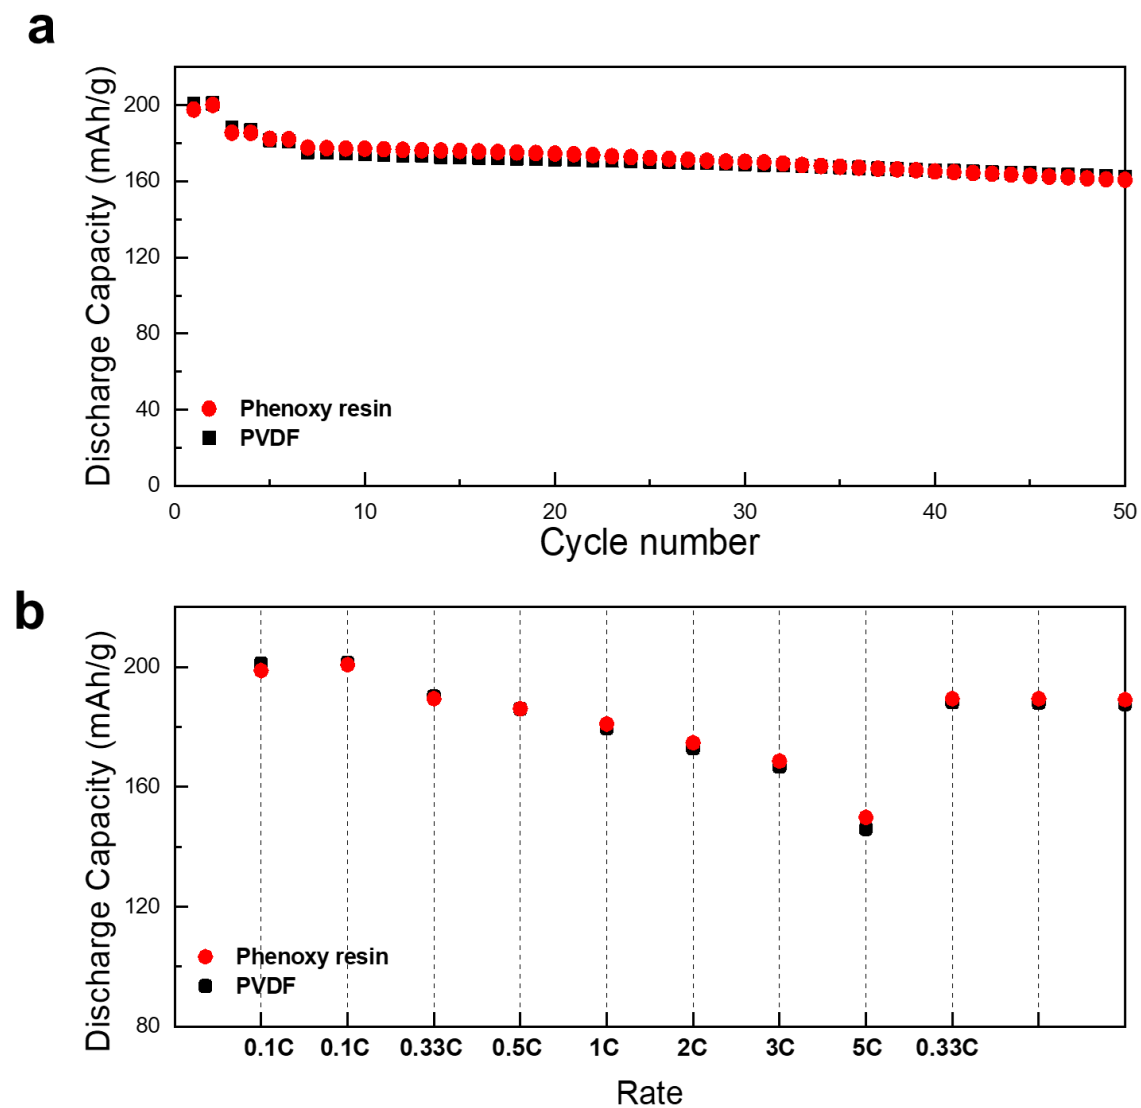

**Figure S2.** Characterizations of electrochemical properties of Loading  $\sim 10 \text{ mg/cm}^2$ : Cycle performances of Phenoxy resin and PVDF at 1C. (a) Rate performances of Phenoxy resin and PVDF at various current density of Phenoxy resin and PVDF. (b).

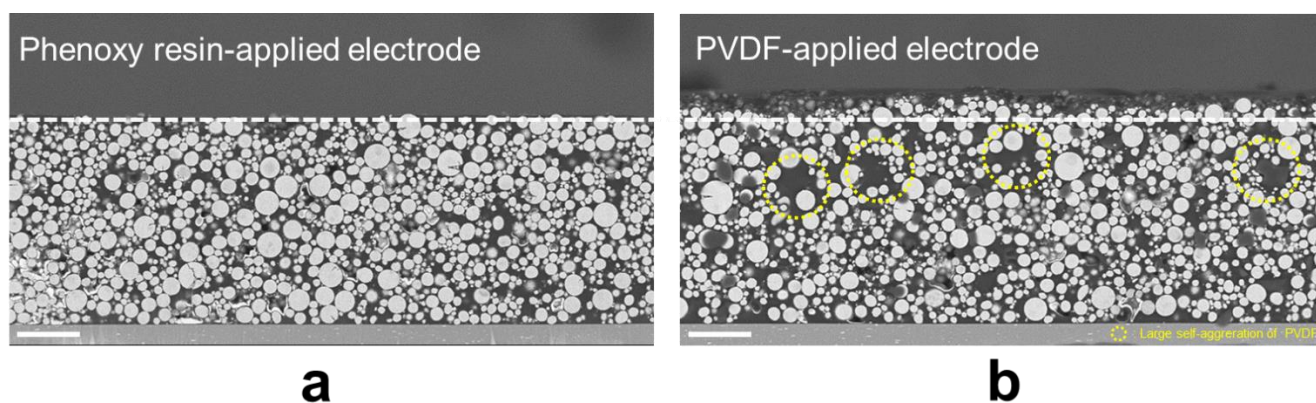

**Figure S3.** Cross-sectional SEM image of electrode surface using (a) Phenoxo resin (b) PVDF. Scale bar = 50  $\mu\text{m}$ .

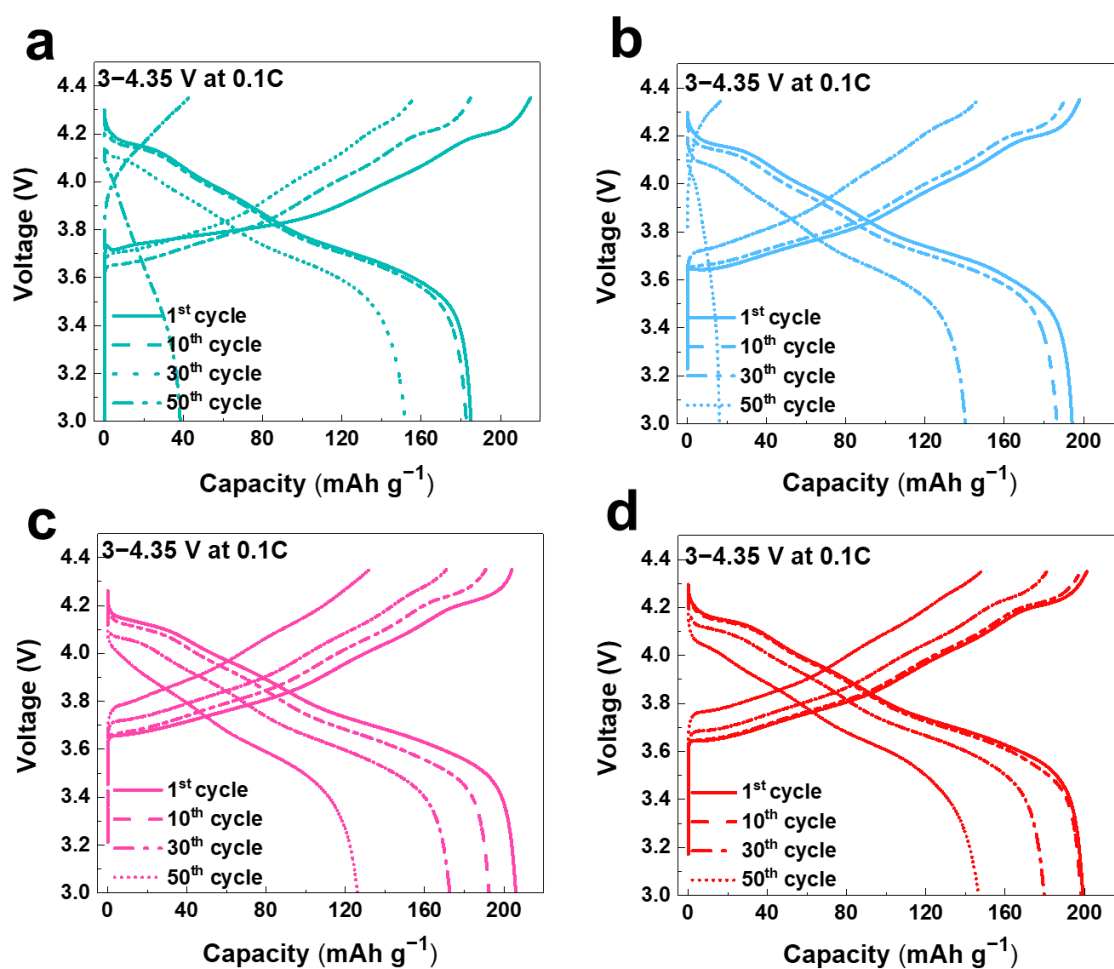

**Figure S4.** Charge/discharge curves at 1<sup>st</sup>, 10<sup>th</sup>, 30<sup>th</sup> and 50<sup>th</sup> cycles of (a) Wet PVDF (b) Dry PVDF (c) Wet Phenoxo resin (d) Dry Phenoxo resin.

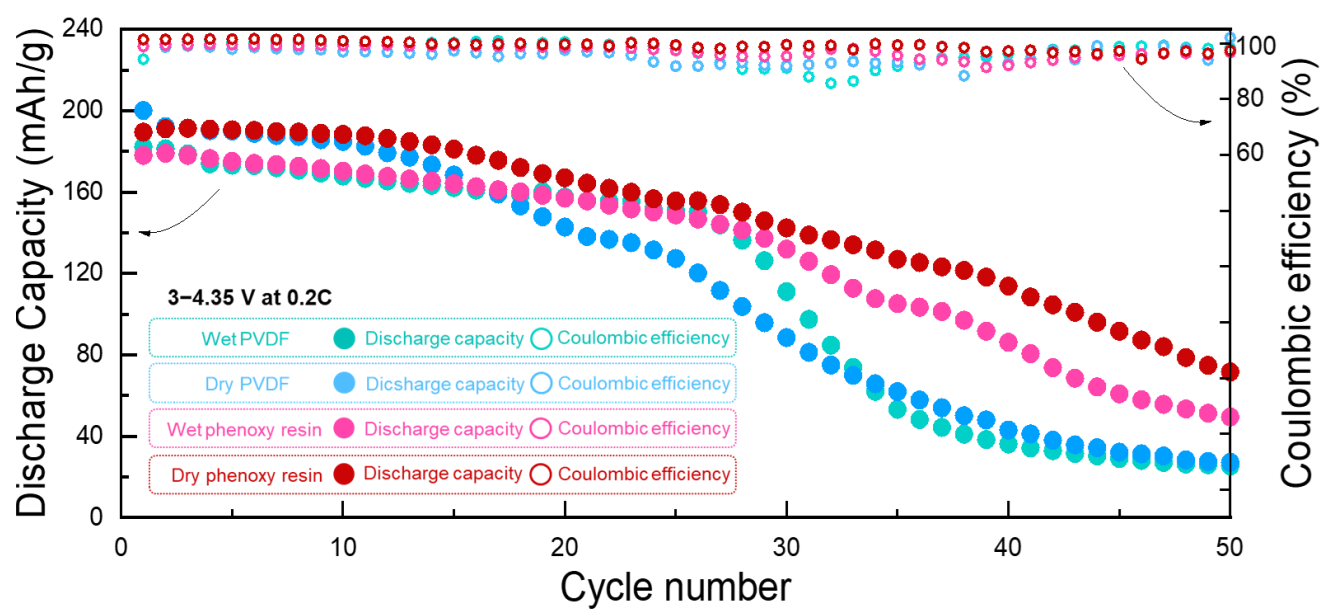

**Figure S5.** Cycle performances of Wet PVDF, Dry PVDF, Wet Phenoxo resin, Dry Phenoxo resin at 0.2C.
